# Supplementary material for: Global Gene Expression Analysis Reveals a Link between NDRG1 and Vesicle Transport
Source: PLoS One. 2014 Jan 31;9(1):e87268. doi: 10.1371/journal.pone.0087268 (PMC3909102; doi:10.1371/journal.pone.0087268)
Supplement: Table S1 — Expression values for genes showing significantly different expression between cells with NDRG1 knock down versus ectopic over-expression of NDRG1. Columns A–E show symbol, name, Genbank Accession number, UniGene ID and Agilent ID, respectively, for each of the genes. Columns F-AD show the relative expression values in the cell populations indicated (header row) compared to the expression in its respective control. Log2 of the ratios of the colour intensity in the cells with altered NDRG1 expression versus the controls are given. (XLS) [file pone.0087268.s002.xls]

## Sheet: 103GenlistZR-Basal_080609pclSor
Gene symbol	Gene name	Gene bank Acc no	Unigene ID	Agilent ID	ME16C2 NDRG1 si4A	ME16C2 NDRG1si4A df	ME16C2 NDRG1 si4B	ME16C2 NDRG1 si4B df	ME16C2 NDRG1 si7A	ME16C2 NDRG1 si7A df	ME16C2 NDRG1 si7B	ME16C2 NDRG1si7B df	SUM102 NDRG1 si4A	SUM102 NDRG1 si4A df	SUM102 NDRG1 si4B	SUM102 NDRG1 si4B df	SUM102 NDRG1 si7B	SUM102 NDRG1 si7B df	SUM102 NDRG1 si7C	SUM102 NDRG1 si7C df	ZR-75-1 NDRG1 A	ZR-75-1 NDRG1 A df	ZR-75-1 NDRG1 B	ZR-75-1 NDRG1 B df	ZR-75-1 NDRG1 C	ZR-75-1 NDRG1 C df	ZR-75-1 NDRG1 D	ZR-75-1 NDRG1 E df	ZR-75-1 NDRG1 F
* EST	EST	BC038245		AGI_HUM1_OLIGO_A_23_P166508	0.455	-0.034	-0.136	-0.277	-0.117	-0.529	0.042	0.212	-0.092	0.411	0.839	0.771	1.006	1.006	-0.687	-0.374	-0.956	-0.769	-0.428	-0.286	-0.062	0.225	-1.196	-1.039	-1.52
CCL28	chemokine (C-C motif) ligand 28	NM_148672	Hs.656904	AGI_HUM1_OLIGO_A_23_P503072	-0.158	0.4015	0.444	0.015	-0.0645	-0.2165	-0.1385	-0.149	0.117	-0.1195	-0.464	0.483	0.301	0.404	0.023	-0.3755	-1.383	-1.1165	0.1435	0.501	-1.264	-0.4405	-1.8755	-1.91	-1.4595
KMO	kynurenine 3-monooxygenase (kynurenine 3-hydroxylase)	NM_003679	Hs.409081	AGI_HUM1_OLIGO_A_23_P200838	0.121	0.13	-0.104	-0.081	0.101	0.085	-0.23	-0.38	0.373	0.252	0.378	0.031	0.587	0.13	0.307	-0.367	-0.283	-0.402	-0.015	-0.072	-0.034	-0.197	-1.94	-1.674	-1.823
GOLM1	golgi membrane protein 1	NM_177937	Hs.494337	AGI_HUM1_OLIGO_A_23_P146506	-0.187	-0.114	-0.236	0.084	-0.218	-0.22	-0.382	-0.108	-0.579	-0.012	-0.159	0.345	-0.17	0.479	-0.026	0.286	-0.662	-0.66	-0.842	-0.545	-0.195	0.269	-1.328	-1.201	-1.131
AZGP1	alpha-2-glycoprotein 1, zinc-binding	NM_001185	Hs.546239	AGI_HUM1_OLIGO_A_23_P71270	0.004	0.002	0.068	-0.271	-0.16	-0.203	-0.089	-0.16	-0.657	-0.051	0.162	1.109	0.065	0.219	-0.132	0.44	-0.279	-0.632	-0.69	-1.065	-0.024	-0.029	-1.407	-1.237	-1.458
PIP	prolactin-induced protein	NM_002652	Hs.99949	AGI_HUM1_OLIGO_A_23_P8702	0.11	-0.086		-0.259	-0.581	-0.059	0.124	0.102	-2.107	0.11	0.126	0.4	-0.01	-0.141	-0.224	0.74	-0.768	-1.307	-0.385	-0.262	-1.433	-1.436	-5.212	-3.767	-4.373
HLA-DRB3	major histocompatibility complex, class II, DR beta 3	NM_022555	Hs.696211	AGI_HUM1_OLIGO_A_23_P145341	0.16	0.298		0.149	0.358	0.565	-0.119	0.194	-0.167	-0.003	-0.301	0.092	0.267	0.356	-0.35	0.486	-0.379	-0.653	-0.454	-0.287	0.051	0.229	-1.211	-0.49	-1.153
TLR5	Toll-like receptor 5	NM_003268	Hs.604542	AGI_HUM1_OLIGO_A_23_P85903	0.151	0.212	0.26	0.352	-0.181	-0.065	-0.324	0.46	-0.286	-0.054	-0.074		-0.043	-0.141	0.279	-0.074	-0.522	-0.856	-0.027	-0.141	-0.263	-0.163	-0.48	-0.465	-0.766
* C16orf45	C16orf45	NM_033201	Hs.401798	AGI_HUM1_OLIGO_A_23_P326319	0.87	0.339	0.314	0.192	0.632	0.291	0.283	-0.023	-0.056	-0.757	0.912	0.63	0.365	-0.296	0.06	-0.405	-0.075	-0.146	0.11	-0.178	-0.725	-0.924	-1.253	-1.515	-1.147
APOD	apolipoprotein D	NM_001647	Hs.522555	AGI_HUM1_OLIGO_A_23_P136775	0.24	-0.386	0.178	0.654	0.321	-0.438	0.53	0.054	1.064	0.9	0.363	0.477	0.43	0.257	0.458	-0.043	-1.786	-2.172	-0.765	-1.105	-0.577	-0.342	0.296	-0.172	0.072
CPS1	carbamoyl-phosphate synthetase 1, mitochondrial	NM_001875	Hs.149252	AGI_HUM1_OLIGO_A_23_P5300	0.07	0.43	0.02	0.5	-0.05	0.58	0.26	0.47	-0.03	-0.19	-0.36	-0.26	0	-0.06	-0.01	0.02	-1.73	-2.22	-1.78	-1.88	-0.31	-0.58	-0.28	0.39	-0.38
SCGB2A2	secretoglobin, family 2A, member 2	NM_002411	Hs.46452	AGI_HUM1_OLIGO_A_23_P161940	0.191	-1.53		0.455	0.536	-0.074		0.359	0.186	-0.306	0.763	0.21	0.239	0.163	0.195	-0.182	-4.22	-4.42	-3.556	-2.081	-1.515	-1.436	-0.511	1.736	-0.569
CDC42EP5	CDC42 effector protein (Rho GTPase binding) 5	NM_145057	Hs.415791	AGI_HUM1_OLIGO_A_23_P414391	0.714	0.362	0.201	0.475	0.41	1.003	0.114	0.324	0.051	-0.074	-0.074	0.21	-0.044	-0.052	-0.395	-0.01	-0.533	-1.398	-0.775	-1.111	-0.088	-0.026	-0.399	-0.125	-0.712
SERPINA1	serpin peptidase inhibitor, clade A (alpha-1 antiproteinase, antitrypsin), member 1	NM_001002236	Hs.525557	AGI_HUM1_OLIGO_A_23_P218111	0.365	0.754	0.13	0.185	0.429	1.18	0.075	0.736	0.076	0.031	0.586	0.499	0.403	0.233	-0.33	-0.371	-1.107	-1.416	-0.229	-0.264	-0.294	-0.217	-0.691	0.029	-0.57
DNAJC12	DnaJ (Hsp40) homolog, subfamily C, member 12	NM_021800	Hs.260720	AGI_HUM1_OLIGO_A_23_P127220	0.774	0.992	0.732	0.642	0.414	0.27	0.152	0.34	0.254	-0.033	0.752	0.594	-0.263	-0.245	0.369	0.573	-0.897	-0.956	-0.752	-0.718	-0.457	0.167	-0.895	0.546	-0.566
SDCCAG8	serologically defined colon cancer antigen 8	NM_006642	Hs.591530	AGI_HUM1_OLIGO_A_23_P34546	0.056	0.169	0.081	0.249	-0.001	0.518	0.392	0.589	-0.086	0.196	0.352	0.649	0.094	-0.002	0.021	0.092	-0.389	-0.368	-0.256	0.053	-0.209	0.01	-0.358	-0.306	-0.499
* TTC19	tetratricopeptide repeat domain 19	NM_017775	Hs.462316	AGI_HUM1_OLIGO_A_23_P50008	-0.277	0.041	0.12	0.743	-0.112	0.177	0.012	0.366	-0.121	0.269	0.238	0.558	0.347	0.335	0.098	0.032	-0.651	-0.584	-0.34	-0.123	-0.358	0.129	-0.076	-0.146	-0.229
MGAT4C	mannosyl (alpha-1,3-)-glycoprotein beta-1,4-N-acetylglucosaminyltransferase, isozyme C (putative)	NM_013244	Hs.589093	AGI_HUM1_OLIGO_A_23_P21462	0.393	-0.101			0.039	-0.414		0.754	-0.309	0.751	0.467	0.039	0.416	0.258	0.102	-0.134	0.045	-1.127	-0.958	-0.289	-0.628	-0.37	-0.587	-0.038	-0.909
TMPRSS3	transmembrane protease, serine 3	NM_024022	Hs.208600	AGI_HUM1_OLIGO_A_23_P211273	-0.061	0.458	0.577	0.459	0.019	-0.27		0.496	0.908	0.322	0.088	-0.314	0.209	0.385	0.484	0.351	-0.006	-0.337	-0.043	0.014	-0.547	-0.319	-0.258	-0.12	-0.474
ITGA5	integrin, alpha 5 (fibronectin receptor, alpha polypeptide)	NM_002205	Hs.505654	AGI_HUM1_OLIGO_A_23_P36554	0.124	0.334	0.434	0.727	0.344	0.921	0.14	0.105	0.082	-0.032	0.922	0.437	0.47	0.192	0.743	0.527	0.273	0.096	-0.354	-0.25	-0.218	-0.215	-0.101	-0.059	0.16
ASPHD1	aspartate beta-hydroxylase domain containing 1	NM_181718	Hs.655761	AGI_HUM1_OLIGO_A_23_P170667	0.704	0.727	0.324	0.459	0.486	0.792	0.382	0.434	0.657	0.539	0.036	-0.071	0.328	0.289	1.179	0.987	-0.058	-0.029	-0.567	-0.659	-0.501	-0.253	0	0.25	0.593
NECAP1	NECAP endocytosis associated 1	NM_015509	Hs.555927	AGI_HUM1_OLIGO_A_23_P13840	-0.114	0.444	-0.266	0.539	1.36	0.788	-0.213	0.824	1.123	0.871	0.33	0.276	0.147	-0.236	0.09	0.637	-0.219	-0.637	-0.653	-0.754	-0.43	0.22	-0.226	0.144	-0.068
TMEM132A	transmembrane protein 132A	NM_017870	Hs.118552	AGI_HUM1_OLIGO_A_23_P24716	0.774	0.941	-0.124	0.486	0.732	1.083	-0.212	0.181	0.525	1.105	0.072	0.364	-0.147	0.002	0.132	0.114	-0.54	-0.611	-0.274	-0.13	-0.166	-0.073	-0.023	-0.153	0.027
* MUM1L1	melanoma associated antigen (mutated) 1-like 1	NM_152423	Hs.592221	AGI_HUM1_OLIGO_A_23_P73571	0.37	0.817		1.347	0.743	0.026	0.101	0.319	1.269	0.085	0.159	0.48	-0.343	0.227	0.131	0.336	-0.156	-0.3	-0.302	-0.319	-0.499	-0.149	-0.008	-0.213	-0.113
KSR1	KSR1	NM_000997		AGI_HUM1_OLIGO_A_24_P20777	0.407	0.197	0.18	0.133	0.283	0.067	0.345	0.081	0.48	-0.01	0.804	0.534	0.422	0.259	-0.172	0.068	0.12	-0.187	0.036	-0.304	0.149	-0.512	-0.198	-0.149	-0.672
RDH16	retinol dehydrogenase 16 (all-trans)	NM_003708	Hs.134958	AGI_HUM1_OLIGO_A_23_P36484	0.351	0.477	-0.004	0.036	0.189	-0.1	0.006	-0.116	0.323	0.013	0.731	0.468	0.244	0.207	0.414	-0.087	-0.078	-0.598	-0.03	-0.298	0.069	-0.226	-0.291	-0.319	-0.249
NFE2L3	nuclear factor (erythroid-derived 2)-like 3	NM_004289	Hs.404741	AGI_HUM1_OLIGO_A_23_P42718	1.02	0.6	0.09	0.38	1.09	0.86	0.79	0.37	0.92	0.88	0.59	0.74	0.56	0.51	0.7	0.51	0.55	0.77	0.32	0.48	0.06	-0.48	-0.2	-0.46	-0.44
PSMB9	proteasome (prosome, macropain) subunit, beta type, 9 (large multifunctional peptidase 2)	NM_002800	Hs.654585	AGI_HUM1_OLIGO_A_23_P111000	0.669	0.495	-0.094	0.791	0.516	0.307	-0.069	-0.002	0.369	0.45	0.828	0.917	0.723	0.473	0.826	0.546	0.096	0.184	-0.039	-0.177	-0.134	0.127	-0.127	-0.545	0.101
CMAS	cytidine monophosphate N-acetylneuraminic acid synthetase	NM_018686	Hs.311346	AGI_HUM1_OLIGO_A_23_P48014	0.228	0.033	-0.064	0.094	0.298	0.203	-0.334	0.091	0.932	0.914	1.171	1.274	1.031	0.889	0.959	0.692	-0.161	-0.318	-0.312	-0.463	-0.297	0.307	0.158	-0.169	-0.091
ETV6	ets variant 6	NM_001987	Hs.504765	AGI_HUM1_OLIGO_A_23_P105264	0.207	0.447	-0.277	-0.326	0.294	0.51	0.37	0.277	0.556	0.963	0.912	1.177	0.597	0.556	0.364	0.355	0.09	0.204	-0.06	-0.122	-0.434	-0.182	-0.038	-0.697	0.112
INTS10	integrator complex subunit 10	NM_018142	Hs.512627	AGI_HUM1_OLIGO_A_23_P157607	-0.071	0.26	0.29	0.082	0.076	0.262	0.159	0.354	-0.034	-0.246	0.445	0.821	0.056	0.264	0.344	0.535	-0.253	-0.046	-0.16	-0.036	0.027	-0.088	-0.437	-0.326	-0.551
SSR3	signal sequence receptor, gamma (translocon-associated protein gamma)	NM_007107	Hs.518346	AGI_HUM1_OLIGO_A_23_P155226	0.105	0.101	-0.049	0.211	0.412	0.512	0.241	0.487	-0.079	0.151	0.608	0.612	0.194	0.288	1.021	0.684	-0.261	-0.168	-0.222	-0.165	-0.136	0.214	-0.069	-0.096	-0.119
SEC24D	SEC24 family, member D (S. cerevisiae)	NM_014822	Hs.189641	AGI_HUM1_OLIGO_A_23_P159382	0.119	0.43	0.682	0.347	0.464	1.049	0.417	0.16	0.73	0.472	0.481	0.897	0.112	0.276	0.792	0.796	-0.589	-0.589	0.015	0.034	0.089	-0.146	-0.367	-0.321	-0.727
ARL1	ADP-ribosylation factor-like 1	NM_001177	Hs.372616	AGI_HUM1_OLIGO_A_23_P139747	0.266	0.312	-0.098	0.108	0.438	0.554	0.033	0.649	0.679	0.698	0.567	0.852	0.203	0.5	0.384	0.853	-0.46	-0.308	-0.326	-0.145	0.361	0.217	-0.564	0.524	-0.576
THBD	thrombomodulin	NM_000361	Hs.2030	AGI_HUM1_OLIGO_A_23_P91390	0.251	0.499	-0.05	0.59	0.853	0.807	-0.136	0.344	0.024	0.827	1.074	2.119	0.246	0.766	0.596	0.965	-0.801	-0.182	-0.227	0.076	0.356	0.205	-0.552	0.13	-0.265
APOLD1	apolipoprotein L domain containing 1	NM_030817	Hs.23388	AGI_HUM1_OLIGO_A_23_P48217	0.566	0.242	0.32	-0.022	0.296	-0.111	1.012	0.761	1.629	1.331	1.173	0.7	0.683	0.302	0.564	0.487	-1.15	-1.443	0.112	0.109	0.338	-0.193	-0.038	-0.146	-0.319
* TTC29	tetratricopeptide repeat domain 29	NM_031956	Hs.378893	AGI_HUM1_OLIGO_A_23_P92517	0.571	-0.013	0.279	1.201	0.708	0.761	1.644	2.079	1.521	1.48	0.952	1.374	0.374	0.652	1.028	0.594	-0.216	-0.542	-0.391	-0.319	0.236	-0.036	-0.302	0.109	-0.214
* TMEM45A	transmembrane protein 45A	NM_018004	Hs.658956	AGI_HUM1_OLIGO_A_23_P113212	0.569	0.916	-0.147	0.03	0.434	0.879	-0.846	-0.482	1.769	2.125	0.663	0.786	0.43	0.555	1.49	1.942	-0.49	0.108	-0.247	0.102	0.288	-0.103	-1.534	-1.041	-1.794
NRCAM	neuronal cell adhesion molecule	NM_005010	Hs.21422	AGI_HUM1_OLIGO_A_23_P215765	0.352	0.645		0.589	0.186	0.366	0.739	0.048	0.678	-0.453	0.597	0.851	0.847	0.621	0.288	0.336	-0.11	-0.438	0.097	-0.01	-0.227	0.425	0.038	-0.74	-0.37
CD47	CD47 molecule	NM_198793	Hs.446414	AGI_HUM1_OLIGO_A_23_P6935	0.246	0.62	-0.264	0.268	0.37	0.469	-0.071	-0.003	0.273	-0.085	0.387	0.15	0.473	0.348	0.538	0.178	-0.634	-0.79	-0.476	-0.52	0.633	0.41	-0.543	-0.791	-0.647
GSDMB	gasdermin B	NM_018530	Hs.306777	AGI_HUM1_OLIGO_A_23_P66454	0.364	0.244	0.106	0.124	0.557	0.55	-0.023	-0.068	-0.156	0.118	-0.07	-0.097	0.203	0.29	0.286	0.201	-0.075	-0.315	-0.17	-0.094	-0.285	0.03	-0.274	-0.566	-0.266
TNIP1	TNFAIP3 interacting protein 1	NM_006058	Hs.355141	AGI_HUM1_OLIGO_A_23_P30435	0.594	0.807	0.228	1.111	0.701	1.299	0.201	0.387	-0.081	-0.034	-0.106	0.217	-0.125	-0.298	0.491	0.4	0.092	-0.135	-0.168	-0.112	-0.136	-0.284	-0.916	-1.124	-0.685
KYNU	kynureninase (L-kynurenine hydrolase)	NM_003937	Hs.470126	AGI_HUM1_OLIGO_A_23_P56898	1.388	1.683	0.914	0.718	1.403	1.474	0.708	1.085	0.01	0.08	-0.356	-0.116	-0.388	0.128	1.197	1.713	0.27	0.419	-0.069	0.053	0.269	0.355	-1.401	-1.548	-1.941
HSD17B2	hydroxysteroid (17-beta) dehydrogenase 2	NM_002153	Hs.162795	AGI_HUM1_OLIGO_A_23_P118065	1.419	2.301	-0.671	-0.208	1.841	2.596	0.05	0.665	0.486	1.145	0.668	1.23	-0.553	-0.124	1.043	1.778	-0.797	-1.156	-1.88	-1.25	0.117	0.372	-2.546	-1.599	-2.373
CLOCK	clock homolog (mouse)	NM_004898	Hs.436975	AGI_HUM1_OLIGO_A_23_P110399	-0.205	0.318	1.16	0.418	0.112	0.516	0.133	-0.053	0.541	0.068	0.332	0.45	0.023	-0.055	0.213	0.191	-0.156	0.255	-0.305	-0.291	0.096	-0.718	-0.03	-0.747	-0.605
COPE	coatomer protein complex, subunit epsilon	NM_199442	Hs.10326	AGI_HUM1_OLIGO_A_23_P209089	0.042	0.356	0.216	1.114	0.104	0.774	-0.15	0.177	0.497	0.435	0.33	0.315	0.369	0.151	0.43	0.259	0.049	-0.383	-0.297	-0.425	0.043	-0.446	-0.25	-0.471	-0.056
SRP54	signal recognition particle 54kDa	NM_003136	Hs.167535	AGI_HUM1_OLIGO_A_23_P162938	-0.042	0.184	0.523	1.276	0.194	0.662	0.059	0.109	0.391	0.421	0.168	0.264	-0.128	-0.067	0.303	0.3	-0.296	-0.316	-0.291	-0.452	-0.44	0.087	-0.076	-0.618	-0.046
EIF3L	eukaryotic translation initiation factor 3, subunit L	NM_016091	Hs.446852	AGI_HUM1_OLIGO_A_23_P57521	0.258	0.385	0.612	1.03	0.147	0.564	0.009	0.274	0.09	0.009	0.25	0.662	0.237	0.004	-0.16	-0.348	-0.042	-0.495	-0.218	-0.279	-0.113	-0.058	-0.413	-0.623	-0.768
RPL6	ribosomal protein L6	NM_000970	Hs.528668	AGI_HUM1_OLIGO_A_23_P151321	0.31	-0.053	0.437	0.867	0.331	0.074	0.199	0.009	0.338	0.035	0.734	0.453	0.449	0.119	0.385	0.121	-0.156	-0.344	0.038	-0.312	0.501	-0.09	-0.267	-0.894	-0.858
FBLN5	fibulin 5	NM_006329	Hs.332708	AGI_HUM1_OLIGO_A_23_P151805	0.382	0.73	1.661	1.777	0.563	0.695	0.916	0.924	1.416	1.194	-0.056	-0.212	0.206	-0.069	0.089	0.503	-0.396	-0.628	0.206	0.509	-0.459	-0.182	-2.184	-1.698	-2.281
TFPI	tissue factor pathway inhibitor (lipoprotein-associated coagulation inhibitor)	NM_006287	Hs.516578	AGI_HUM1_OLIGO_A_23_P17095	0.384	-0.027	0.105	0.396	0.792	0.314	0.476	0.262	0.268	0.595	0.468	0.804	0.048	0.216	-0.174	-0.127	0.01	-0.165	-0.309	-0.099	-0.5	-0.092	0.21	-0.721	-0.284
CKAP4	cytoskeleton-associated protein 4	NM_006825	Hs.74368	AGI_HUM1_OLIGO_A_23_P48058	-0.545	-0.215	-0.132	-0.023	-0.065	0.166	0.069	-0.126	0.354	0.1	0.331	0.371	1.113	0.763	1.053	1.044	-0.221	-0.279	-0.104	-0.508	-0.499	-0.194	-0.854	-0.687	-0.129
* TMTC1	transmembrane and tetratricopeptide repeat containing 1	NM_175861	Hs.401954	AGI_HUM1_OLIGO_A_23_P203957	0.022	0.432	0.383	0.189	-0.249	-0.027	0.095	0.335	0.795	0.619	0.382	1.085	0.41	0.73	-0.01	0.354	-0.204	-0.15	-0.827	-0.73	-1.391	-1.131	0.126	-0.288	-0.023
* CCDC51	coiled-coil domain containing 51	NM_024661	Hs.187657	AGI_HUM1_OLIGO_A_23_P69362	-0.008	-0.111	0	-0.333	-0.438	-0.312	-0.306	-0.436	-0.375	-0.594	-0.841	-0.921	-0.782	-0.901	-0.756	-0.791	0.113	-0.12	0.108	-0.125	-0.174	-0.1	0.299	-0.164	0.301
CNTN1	contactin 1	BX648591	Hs.143434	AGI_HUM1_OLIGO_A_23_P204541	0.099	0.169	0.107	-0.151	-0.188	-0.178	0.077	0.181	-0.163	-0.311	-0.717	-0.703	-0.745	-0.504	-1.117	-0.145	0.03	0.138	0.421	0.351	1.152	-0.003	0.631	1.017	0.028
ZNF426	zinc finger protein 426	NM_024106	Hs.594011	AGI_HUM1_OLIGO_A_23_P101351	0.1	0.042	0.258	0.142	0.116	-0.027	-0.113	0.095	0.058	-0.334	-1.016	-0.425	-1.239	-0.706	-0.583	-0.048	0.422	0.467	0.926	0.279	0.22	0.272	0.079	0.848	0.408
CYC1	cytochrome c-1	NM_001916	Hs.289271	AGI_HUM1_OLIGO_A_23_P32384	-0.276	-0.22	-0.02	0.168	-0.491	-0.557	-0.634	-0.189	-0.094	0.042	-0.772	-0.145	-1.271	-0.84	-0.278	-0.445	0.276	0.48	0.371	0.567	0.363	0.017	-0.156	0.005	-0.03
TRUB1	TruB pseudouridine (psi) synthase homolog 1 (E. coli)	NM_139169	Hs.21187	AGI_HUM1_OLIGO_A_23_P63908	0.274	-0.002	-0.621	-0.422	0.09	-0.838	-0.074	0.161	-0.064	0.004	-0.436	-0.341	-1.012	-0.842	-0.65	-0.74	0.069	0.637	0.195	0.401	0.743	0.208	-0.06	0.299	-0.053
* TMEM14A	transmembrane protein 14A	NM_014051	Hs.94896	AGI_HUM1_OLIGO_A_23_P42080	-0.125	-0.149	-0.117	-0.562	-0.214	-0.795	-0.547	-0.759	-0.088	-0.253	-0.697	-0.783	-0.037	0.326	0.097	0.258	0.195	0.348	0.265	0.254	0.678	0.008	0.136	0.587	0.377
TMEM70	transmembrane protein 70	NM_017866	Hs.106650	AGI_HUM1_OLIGO_A_23_P253963	0.025	-0.279	-0.145	-0.097	-0.247	-0.456	-0.345	-0.301	-0.224	-0.323	-0.617	-0.731	-0.392	-0.434	0.311	-0.206	0.101	0.727	0.156	-0.045	1.075	-0.062	0.316	0.268	0.412
* C3orf14	chromosome 3 open reading frame 14	NM_020685	HS.47166	AGI_HUM1_OLIGO_A_23_P29655	-0.146	-0.417	-0.31	-0.522	0.04	-0.542	-0.42	-0.707	-0.853	0.029	-1.258	-1.18	-0.913	-0.827	0.35	0.386	0.29	0.232	0.473	0.315	0.549	-0.157	0.255	0.008	0.409
* EST	EST			AGI_HUM1_OLIGO_A_23_P68505	-0.157	-0.845	-0.464	-0.748	-0.14	-1.052	-0.807	-1.394	0.076	-0.398	-1.191	-1.232	-0.677	-0.496	0.128	0.042	0.457	0.658	0.233	0.267	0.602	-0.054	-0.165	-0.37	-0.099
AGMAT	agmatine ureohydrolase (agmatinase)	NM_024758	Hs.567583	AGI_HUM1_OLIGO_A_23_P103720	0.246	-0.08		-0.709	0.327	-0.389		-0.302	-0.277	-0.65	-0.92	-0.804	-0.511	-0.566	0.33	0.136	0.285	0.543	0.24	0.761	0.181	0.29	0.585	0.385	0.718
NMB	neuromedin B	NM_021077	Hs.386470	AGI_HUM1_OLIGO_A_23_P88522	0.083	-0.072	0.205	-0.114	-0.007	-0.501	0.025	-0.295	-0.439	-0.452	-0.611	-0.621	-0.526	-0.467	0.044	-0.075	0.375	0.631	0.195	0.366	0.251	0.246	0.296	0.237	0.173
PGBD1	piggyBac transposable element derived 1	NM_032507	Hs.144527	AGI_HUM1_OLIGO_A_23_P156625	-0.212	-0.392	0.069	-0.06		-0.726	-0.465	-0.396	-0.101	-0.251	-0.312	-0.169	-0.083	-0.268	-0.616	0.059	0.559	0.387	0.321	0.387	0.551	0.153	-0.314	0.439	0.183
XRCC6BP1	XRCC6 binding protein 1	NM_0033276	Hs.61188	AGI_HUM1_OLIGO_A_23_P53363	-0.217	-0.372	-0.381	-0.245	-0.28	-0.6	-0.43	-0.133	-0.262	-0.322	-0.16	-0.086	0.131	0.316	-0.263	-0.078	0.119	0.248	0.398	0.378	0.475	0.179	-0.129	0.518	-0.142
FZD5	frizzled homolog 5 (Drosophila)	NM_003468	Hs.17631	AGI_HUM1_OLIGO_A_23_P397999	-0.512	-0.655	-0.384	-0.312	-0.468	-0.956	-0.334	-0.26	-0.244	-0.283	-0.318	-0.404	-0.676	-0.465	-0.126	-0.1	0.399	1.068	0.215	0.46	0.227	0.229	-0.097	0.181	-0.515
MRPS36	mitochondrial ribosomal protein S36	NM_033281	Hs.631971	AGI_HUM1_OLIGO_A_23_P29575	-0.283	-0.229	-0.463	-0.559	0.07	-0.336	-0.234	-0.377	-0.564	0.409	-0.433	-0.162	-0.308	-0.093	-0.36	-0.238	0.09	0.239	0.175		-0.177	0.095	0.366	0.169	0.382
ZNF552	zinc finger protein 552	NM_024762	Hs.560727	AGI_HUM1_OLIGO_A_23_P38824	-0.231	-0.251	0.011	-0.466	-0.428	-0.69	-0.208	-0.507	-0.474	-0.345	-0.458	-0.612	-0.193	-0.325	-0.791	-0.302	-0.109	0.156	-0.029	0.329	0.474	0.147	-0.197	-0.218	-0.014
MCAM	melanoma cell adhesion molecule	NM_006500	Hs.599039	AGI_HUM1_OLIGO_A_23_P162171	-0.737	-1.157	-0.638	-0.696	-0.785	-0.995	-0.104	-0.77	-0.417	0.131	-0.557	-0.175	-0.299	-0.411	-0.77	-0.352	-0.231	0.177	-0.252	0.052	-0.075	0.09	-0.048	0.194	1.077
DOCK11	dedicator of cytokinesis 11	NM_144658	Hs.368203	AGI_HUM1_OLIGO_A_23_P148584	-0.705	-0.776	-0.684	-0.604	-0.287	-0.929	-0.261	-0.239	0.011	0.104	-0.413	-0.402	-0.476	-0.262	-0.828	-0.618	0.144	0.434	0.027	0.244	0.551	0.053	0.544	0.284	0.081
MAEA	macrophage erythroblast attacher	NM_001017405	Hs.139896	AGI_HUM1_OLIGO_A_23_P29885	-0.334	-0.55	-0.292	-0.19	-0.399	-0.787	-0.118	0	-0.141	-0.17	-0.514	-0.587	-0.177	0.032	-0.449	-0.199	0.05	-0.026	0.014	0.07	0.189	0.075	0.16	0.241	0.21
CALML3	calmodulin-like 3	NM_005185	Hs.239600	AGI_HUM1_OLIGO_A_23_P60617	-0.599	-0.643	-1.481	-1.232	-1.245	-1.188	-1.796	-1.561	-0.628	-0.118	-0.99	-0.679	-0.685	-0.481	-1.917	-1.866	0.443	0.295	0.054	-0.599	-0.132	0.179	0.237	-0.693	0.413
* FLJ34773	FLJ34773	AK092092		AGI_HUM1_OLIGO_A_23_P28997	0.013	-0.185	-0.459	-0.421	-0.344	-0.306	-0.234	-0.571	-0.048	-0.088	-0.483	-0.299	-0.372	-0.507	-0.469	0.142	0.19	0.259	0.099	0.243	0.114	-0.248	0.1	0.213	0.348
* EST	EST			AGI_HUM1_OLIGO_A_23_P134353	-0.192	-0.185	-0.382	-0.252	-0.23	-0.871	-0.346	-0.529	-0.247	-0.16	-0.247	-0.278	-0.374	-0.044	-0.164	-0.189	0.443	0.366	0.135	0.409	0.169	-0.044	0.658	-0.38	0.335
ARHGEF16	Rho guanine exchange factor (GEF) 16	NM_014448	Hs.87435	AGI_HUM1_OLIGO_A_23_P114670	-0.998	-0.652	-0.404	-0.379	-0.829	-0.887	-0.797	-0.855	-0.433	-0.383	-0.202	0.075	-0.8	-0.491	0.048	-0.031	0.101	0.307	0.05	-0.095	-0.163	-0.178	0.163	0.2	0.256
RP2	retinitis pigmentosa 2 (X-linked recessive)	NM_006915	Hs.44766	AGI_HUM1_OLIGO_A_23_P22433	-0.307	-0.15	-0.72	-0.463	0.142	-0.183	-0.332	-0.135	-0.18	0.22	-1.304	-0.907	-1.039	-0.333	-1.053	-0.394	-0.243	0.346	-0.013	0.69	0.374	0.123	-0.07	0.79	-0.007
HEXIM1	hexamethylene bis-acetamide inducible 1	NM_006460	Hs.15299	AGI_HUM1_OLIGO_A_23_P118552	-0.21	-0.206	-0.509	-0.086	-0.413	-0.584	-0.602	-0.198	-0.11	-0.109	-0.62	-0.589	-0.538	-0.276	-1.254	-0.737	-0.006	0.346	0.127	0.558	0.073	-0.024	0.032	0.942	-0.078
RASL11B	RAS-like, family 11, member B	NM_023940	Hs.8035	AGI_HUM1_OLIGO_A_23_P69738	-0.114	-0.277	-0.138	-0.045	-0.288	-0.509	-0.423	-0.33	-0.048	-0.253	-0.333	-0.62	-0.605	-0.385	-0.892	-0.207	0.478	0.508	0.134	0.272	-0.338	0.257	0.202	1.273	-0.169
NDRG1	N-myc downstream regulated gene 1	NM_006096	Hs.372914	AGI_HUM1_OLIGO_A_23_P20494	-2.424	-2.185	-3.108	-2.975	-0.963	-0.268	-1.512	-1.207	-2.338	-2.141	-3.079	-2.828	-1.721	-1.745	-1.461	-1.545	4.546	3.869	4.955	3.088	2.668	3.819	3.534	2.54	2.803
* FAM161B	family with sequence similarity 161, member B	NM_152445	Hs.660789	AGI_HUM1_OLIGO_A_23_P365226	-0.198	-0.086	-0.555	-0.255	-0.262	-0.121	-1.197	-0.406	0.224	-0.216	-0.238	0.016	-0.074	-0.269	-0.202	0.088	0.214	0.05	0.118	0.388	0.341	0.482	0.138	0.388	0.196
NKAIN1	Na+/K+ transporting ATPase interacting 1	NM_024522	Hs.470259	AGI_HUM1_OLIGO_A_23_P51376	-0.163	0.07	-0.482	-0.298	-0.081	-0.006	0.084	0.116	-0.465	-0.055	0.086	-0.238	-0.135	-0.297	0.228	-0.038	0.123	0.732	0.249	0.488	0.013	0.623	0.599	1.178	0.853
SLC16A3	solute carrier family 16, member 3 (monocarboxylic acid transporter 4)	NM_004207	Hs.500761	AGI_HUM1_OLIGO_A_23_P147345	-0.084	-0.175	-0.195	-0.346	-0.075	-0.148	-0.3125	-0.3805	-0.2085	-0.2775	-0.1405	-0.3685	0.311	-0.067	0.8445	0.7815	1.4645	1.9155	0.783	0.6345	-0.1245	-0.01	1.4305	2.0025	1.5115
